# Supplementary material for: CpG Site-Specific Regulation of Metallothionein-1 Gene Expression
Source: PubMed Central journal article supplement (PMC7503544; doi:10.3390/ijms21175946), 2020-08-19
Supplement: ijms-21-05946-s001.pdf [file ijms-21-05946-s001.pdf]

**Supplementary Table S1** Primer and synthetic DNA sequences for construction of reporter vectors.

|             | Target                 | Template         | Sequence                                                                                                                                                                                                                                                                                                                                                     |
|-------------|------------------------|------------------|--------------------------------------------------------------------------------------------------------------------------------------------------------------------------------------------------------------------------------------------------------------------------------------------------------------------------------------------------------------|
| Inverse PCR | $\Delta$ -11/+42       | pCpGf-WT         | F 5' - CCGCCCCGAGACTATAAAGAGGGCAGG - 3'<br>R 5' - TATAGTCTCGGGCGGAGTGCAGAGC - 3'                                                                                                                                                                                                                                                                             |
|             | $\Delta$ MREabc        | pCpGf-WT         | F 5' - AAGCTTGAAAAGTGCCTCGGCTCTG - 3'<br>R 5' - GCACTTTTCAAGCTTTGCATGCTAC - 3'                                                                                                                                                                                                                                                                               |
|             | $\Delta$ MREde         | pCpGf-WT         | F 5' - CAAAGCTTTGCACACTGGCGCTCCAG - 3'<br>R 5' - GTGTGCAAAGCTTTGCATGCTACTA - 3'                                                                                                                                                                                                                                                                              |
|             | m14<br>CG→CC           | pCpGf-<br>m15-21 | F 5' - GCACTCAGCCCCGAAAAGTGCCTCGG - 3'<br>R 5' - TTTCCGGGCTGAGTGCAGAGCTCCCTG - 3'                                                                                                                                                                                                                                                                            |
|             | m15<br>CG→CC           | pCpGf-WT         | F 5' - CACTGGCCCTCCAGGAGCTCTGCAC - 3'<br>R 5' - CCTGGAGGGCCAGTGTGCACAGCGGG - 3'                                                                                                                                                                                                                                                                              |
|             | m8<br>CG→CC            | pCpGf-WT         | F 5' - GCGGGGCCGTGACTATGCGTGGGCT - 3'<br>R 5' - GTCACGGGCCCGCGTCCTTGGCAG - 3'                                                                                                                                                                                                                                                                                |
|             | Synthetic DNA fragment | m15-21           |                                                                                                                                                                                                                                                                                                                                                              |
| m1-12       |                        |                  | 5' - TGGCCTCGGCGGCCAAGCTTGATAGGCCGTAATATCGGGGAAAGCACTAT<br>AGGGACATGATGTTCCACACGTACATGGGTCTCTATCCGAGCCAGTCTGCT<br>GCCAAAGGGGCGGTCCCCCTGTGCACACTGGCGCTCCAGGGAGCTCTGCACT<br>CCGCCCCGAAAAGTGCACACTCAGCTCTGCCAAGGAGGGGGGCCCTGACTATG<br>CCTGGGCTGGAGCAACCCCTGCTGGGTGCAAACCCTTTGCACCCAGACTCC<br>TCCAACCACTATAAAGAGGGCAGGCTGTCTCTAAGCCATGGAAGATGCCAA<br>AACATT - 3' |

F: forward primer, R: reverse primer. To construct pCpGf-m14-21, CpG14 in pCpGf-m15-21 was mutated by inverse PCR. Mutated CpG dinucleotides are underlined.
